# Supplementary material
Source: PubMed Central journal article supplement (PMC3428003)
Supplement: supp_ers168_00078121_file001.pdf [file supp_ers168_00078121_file001.pdf]

**The *Citrus* ABA-signalosome: Identification and transcriptional regulation during sweet orange fruit ripening and leaf dehydration**

PACO ROMERO, MARÍA T. LAFUENTE AND MARÍA J. RODRIGO\*

## Supplementary Material

**Table S1.** Colour evolution (*a/b* ratio) of ‘Navelate’ and ‘Pinalate’ fruits during ripening.

|                              | Month     | <i>a/b</i> ratio |              |
|------------------------------|-----------|------------------|--------------|
|                              |           | Navelate         | Pinalate     |
| <b>Immature green (IG)</b>   | July      | -0.89 ± 0.01     | -0.89 ± 0.01 |
| <b>Mature green I (MI)</b>   | September | -0.72 ± 0.01     | -0.72 ± 0.01 |
| <b>Mature green II (MII)</b> | October   | -0.41 ± 0.01     | -0.50 ± 0.01 |
| <b>Breaker (Bk)</b>          | October   | -0.13 ± 0.01     | -0.31 ± 0.01 |
| <b>Coloured (C)</b>          | November  | 0.49 ± 0.01      | 0.10 ± 0.01  |
| <b>Full coloured (FC)</b>    | February  | 0.63 ± 0.01      | 0.12 ± 0.01  |

Values are mean of three replicates ± SD.

**Table S2.** Primers designed for gene expression analyses by quantitative RT-PCR (qRT-PCR).

| <i>Citrus</i> gene | Homologous in <i>A. thaliana</i>                 | Forward / Reverse | Sequence 5' → 3'            | Amplicon size (bp) |
|--------------------|--------------------------------------------------|-------------------|-----------------------------|--------------------|
| <i>CsPYR1</i>      | AT4G17870;<br>Pyrabactin Resistance 1            | F                 | CCGGGGTAACTCAGGACGAG        | 198                |
|                    |                                                  | R                 | CGGAGACGGAACAGCTCTTG        |                    |
| <i>CsPYL2</i>      | AT2G26040;<br>PYR1-Like protein 2                | F                 | GGCCTATCATCGAAAGATAACC      | 209                |
|                    |                                                  | R                 | CGATACAACCGTCACTTCTC        |                    |
| <i>CsPYL4</i>      | AT2G38310;<br>PYR1-Like protein 4                | F                 | CGAACGAAGACACCTGCGTG        | 168                |
|                    |                                                  | R                 | CGAGAACAGAACATGACCTG        |                    |
| <i>CsPYL5</i>      | AT5G05440;<br>PYR1-Like protein 5                | F                 | GCCCGGCGGTACATCACAAA        | 184                |
|                    |                                                  | R                 | GCCCCGAGCTAACAGCACG         |                    |
| <i>CsPYL8</i>      | AT4G27920;<br>PYR1-Like protein 8                | F                 | GCGGTGCATTTTGGACGCTTC       | 111                |
|                    |                                                  | R                 | GGCAAAGCCTTAGCAGAATCG       |                    |
| <i>CsPYL9</i>      | AT1G01360;<br>PYR1-Like protein 9                | F                 | CGGAGATCATCGACGGGAGA        | 166                |
|                    |                                                  | R                 | CGGTCCTGCACCGCCATCC         |                    |
| <i>CsABII</i>      | AT4G26080;<br>ABA-insensitive 1                  | F                 | GGTACTGCAAAAAGCACGAT        | 129                |
|                    |                                                  | R                 | GGGGCAACAGGTTACCTCC         |                    |
| <i>CsAHG1</i>      | AT5G51760;<br>ABA-hypersensitive germination 1   | F                 | CGGGTAATGCGAATGCGGG         | 170                |
|                    |                                                  | R                 | CCCAACGCTCCCACACGCGCACG     |                    |
| <i>CsAHG3</i>      | AT3G11410;<br>ABA-hypersensitive germination 3   | F                 | GGGATGACTTCAGTTTGC GGTA     | 227                |
|                    |                                                  | R                 | CGGAGCTCTTCACTTTAATGGC      |                    |
| <i>CsHAB1</i>      | AT1G72770;<br>Hypersensitive to ABA 1            | F                 | CCGGAGTGTCTTCGAGGTGG        | 173                |
|                    |                                                  | R                 | GGCCATTCAAACAGTGGCTC        |                    |
| <i>CsHAI3</i>      | AT5G59220;<br>Highly ABA-induced 3               | F                 | GCCCCTGGCGGCCACTCC          | 245                |
|                    |                                                  | R                 | GGCCCACACATATAGAAACC        |                    |
| <i>CsSnRK2.2</i>   | AT3G50500;<br>SNF1-related protein kinase 2.2    | F                 | CTGTTCCAGACACTAATCCA        | 165                |
|                    |                                                  | R                 | GGTACTCATAGTCTTTTCATCC      |                    |
| <i>CsSnRK2.6</i>   | AT4G33950;<br>SNF1-related protein kinase 2.6    | F                 | GAGCCAAAGAACTCCGCAA         | 139                |
|                    |                                                  | R                 | GGGTTTCGGATCTCGGGTAT        |                    |
| <i>CsALDH3</i>     | AT1G44170;<br>Aldehyde Dehydrogenase 3 H1        | F                 | GGAGTGAGGAGGAGACGAAGA       | 188                |
|                    |                                                  | R                 | ACGAAGAGCGTCGACGATGTC       |                    |
| <i>CsHVA22E</i>    | AT5G50720;<br>Abscisic acid induced-like protein | F                 | GCGGCATGGCTGGTTCTGC         | 178                |
|                    |                                                  | R                 | GCCTCGTGCTCCCCTTTCTT        |                    |
| <i>CsACT</i>       | AT5G09810;<br>Actin7. Structural constituent     | F                 | TTAACCCCAAGGCCAACAGA        | 176                |
|                    |                                                  | R                 | TCCCTCATAGATTGGTACAGTATGAGA |                    |
| <i>CsGAPDH</i>     | AT1G13440;<br>Glyceraldehyde-3P dehydrogenase    | F                 | CGTCCCTCTGCAAGATGACTCT      | 204                |
|                    |                                                  | R                 | GGAAGGTCAAGATCGGAATCAA      |                    |
| <i>CsTUB</i>       | AT1G75780;<br>Tubulin1. Structural constituent   | F                 | GCATCTTGAACCCGGTAC          | 158                |
|                    |                                                  | R                 | ATCAATTCGGCGCCTTCAG         |                    |

**Table S3.** Similarity matrix between *Citrus* and *Arabidopsis* PYR/PYL/RCAR proteins based on deduced amino acid and sequences alignment.

|         | AtPYR1 | AtPYL1 | AtPYL2 | AtPYL3 | AtPYL4 | AtPYL5 | AtPYL6 | AtPYL7 | AtPYL8 | AtPYL9 | AtPYL10 | AtPYL11 | AtPYL12 | AtPYL13 | CsPYR1 | CsPYL2 | CsPYL4 | CsPYL5 | CsPYL8 | CsPYL9 |
|---------|--------|--------|--------|--------|--------|--------|--------|--------|--------|--------|---------|---------|---------|---------|--------|--------|--------|--------|--------|--------|
| AtPYR1  | 100    |        |        |        |        |        |        |        |        |        |         |         |         |         |        |        |        |        |        |        |
| AtPYL1  | 77.50  | 100    |        |        |        |        |        |        |        |        |         |         |         |         |        |        |        |        |        |        |
| AtPYL2  | 39.00  | 35.80  | 100    |        |        |        |        |        |        |        |         |         |         |         |        |        |        |        |        |        |
| AtPYL3  | 35.20  | 31.70  | 56.50  | 100    |        |        |        |        |        |        |         |         |         |         |        |        |        |        |        |        |
| AtPYL4  | 51.40  | 44.00  | 39.20  | 31.10  | 100    |        |        |        |        |        |         |         |         |         |        |        |        |        |        |        |
| AtPYL5  | 39.70  | 33.20  | 36.40  | 28.70  | 45.40  | 100    |        |        |        |        |         |         |         |         |        |        |        |        |        |        |
| AtPYL6  | 46.90  | 42.00  | 37.60  | 27.00  | 57.20  | 40.90  | 100    |        |        |        |         |         |         |         |        |        |        |        |        |        |
| AtPYL7  | 31.10  | 30.70  | 27.80  | 27.20  | 31.70  | 31.20  | 29.80  | 100    |        |        |         |         |         |         |        |        |        |        |        |        |
| AtPYL8  | 42.10  | 41.00  | 31.70  | 30.20  | 48.40  | 37.10  | 41.70  | 41.80  | 100    |        |         |         |         |         |        |        |        |        |        |        |
| AtPYL9  | 30.00  | 28.90  | 31.30  | 28.70  | 32.00  | 32.70  | 30.10  | 81.30  | 44.00  | 100    |         |         |         |         |        |        |        |        |        |        |
| AtPYL10 | 40.80  | 39.60  | 32.60  | 27.70  | 47.70  | 34.70  | 42.90  | 39.80  | 70.30  | 42.00  | 100     |         |         |         |        |        |        |        |        |        |
| AtPYL11 | 36.40  | 36.50  | 38.80  | 30.10  | 39.50  | 38.50  | 39.70  | 36.30  | 33.60  | 36.30  | 35.30   | 100     |         |         |        |        |        |        |        |        |
| AtPYL12 | 36.80  | 34.40  | 37.30  | 29.20  | 37.70  | 39.20  | 38.70  | 34.50  | 32.50  | 34.50  | 32.90   | 81.10   | 100     |         |        |        |        |        |        |        |
| AtPYL13 | 36.20  | 32.50  | 32.70  | 27.80  | 34.00  | 33.60  | 36.40  | 34.70  | 29.30  | 34.70  | 32.50   | 63.10   | 66.00   | 100     |        |        |        |        |        |        |
| CsPYR1  | 73.40  | 65.20  | 37.00  | 34.00  | 48.20  | 33.50  | 43.50  | 32.60  | 43.90  | 33.50  | 43.40   | 37.50   | 36.20   | 33.80   | 100    |        |        |        |        |        |
| CsPYL2  | 43.00  | 38.50  | 66.70  | 63.60  | 41.30  | 39.40  | 36.10  | 32.00  | 37.80  | 33.00  | 34.30   | 39.70   | 39.20   | 36.10   | 43.30  | 100    |        |        |        |        |
| CsPYL4  | 50.80  | 45.60  | 36.80  | 29.10  | 68.30  | 46.00  | 56.70  | 29.40  | 47.80  | 31.90  | 43.30   | 41.10   | 39.30   | 36.90   | 46.60  | 39.30  | 100    |        |        |        |
| CsPYL5  | 52.10  | 46.90  | 41.30  | 34.40  | 65.50  | 46.20  | 55.20  | 36.00  | 45.50  | 36.20  | 44.80   | 43.60   | 40.00   | 37.60   | 47.40  | 46.40  | 68.70  | 100    |        |        |
| CsPYL8  | 29.00  | 28.80  | 30.10  | 26.50  | 31.70  | 29.70  | 28.30  | 37.30  | 52.70  | 45.20  | 48.50   | 34.20   | 33.10   | 32.20   | 29.90  | 32.10  | 29.70  | 32.40  | 100    |        |
| CsPYL9  | 32.00  | 32.90  | 35.20  | 31.70  | 38.40  | 33.30  | 32.30  | 45.20  | 50.30  | 52.40  | 47.90   | 37.90   | 35.30   | 34.10   | 37.10  | 38.40  | 32.80  | 37.00  | 80.00  | 100    |

**Table S4.** Similarity matrix between *Citrus* and *Arabidopsis* clade-A PP2C proteins based on deduced amino acid and sequences alignment.

|        | AtABI1 | AtABI2 | AtAHG1 | AtAHG3 | AtHAB1 | AtHAB2 | AtHAI1 | AtHAI2 | AtHAI3 | CsABI1 | CsAHG1 | CsAHG3 | CsHAB1 | CsHAI3 |
|--------|--------|--------|--------|--------|--------|--------|--------|--------|--------|--------|--------|--------|--------|--------|
| AtABI1 | 100    |        |        |        |        |        |        |        |        |        |        |        |        |        |
| AtABI2 | 79.30  | 100    |        |        |        |        |        |        |        |        |        |        |        |        |
| AtAHG1 | 39.00  | 37.60  | 100    |        |        |        |        |        |        |        |        |        |        |        |
| AtAHG3 | 44.30  | 47.80  | 43.30  | 100    |        |        |        |        |        |        |        |        |        |        |
| AtHAB1 | 45.50  | 52.20  | 36.70  | 36.80  | 100    |        |        |        |        |        |        |        |        |        |
| AtHAB2 | 51.40  | 57.30  | 39.50  | 41.40  | 71.30  | 100    |        |        |        |        |        |        |        |        |
| AtHAI1 | 40.50  | 45.10  | 39.60  | 55.70  | 37.10  | 39.70  | 100    |        |        |        |        |        |        |        |
| AtHAI2 | 42.00  | 44.50  | 38.60  | 55.30  | 37.80  | 39.70  | 59.10  | 100    |        |        |        |        |        |        |
| AtHAI3 | 46.20  | 46.30  | 43.10  | 59.80  | 40.40  | 42.40  | 66.60  | 66.50  | 100    |        |        |        |        |        |
| CsABI1 | 54.20  | 58.70  | 39.50  | 40.80  | 43.70  | 50.40  | 40.40  | 39.80  | 42.70  | 100    |        |        |        |        |
| CsAHG1 | 40.80  | 45.30  | 41.90  | 65.20  | 36.20  | 40.60  | 52.60  | 53.40  | 61.40  | 40.80  | 100    |        |        |        |
| CsAHG3 | 40.50  | 45.30  | 41.80  | 65.30  | 36.60  | 41.10  | 52.80  | 53.40  | 61.40  | 41.00  | 97.80  | 100    |        |        |
| CsHAB1 | 53.90  | 58.20  | 40.70  | 38.80  | 55.10  | 58.50  | 40.20  | 37.70  | 42.90  | 61.00  | 39.50  | 39.90  | 100    |        |
| CsHAI3 | 42.50  | 42.40  | 37.90  | 60.10  | 41.10  | 40.90  | 63.60  | 55.20  | 64.70  | 40.70  | 57.70  | 57.70  | 40.80  | 100    |

**Table S5.** Similarity matrix between *Citrus* and *Arabidopsis* subclass III SnRK2 proteins based on deduced amino acid and sequences alignment.

|           | AtSnRK2.2 | AtSnRK2.3 | AtSnRK2.6 | CsSnRK2.2 | CsSnRK2.6 |
|-----------|-----------|-----------|-----------|-----------|-----------|
| AtSnRK2.2 | 100       |           |           |           |           |
| AtSnRK2.3 | 88.40     | 100       |           |           |           |
| AtSnRK2.6 | 74.40     | 75.50     | 100       |           |           |
| CsSnRK2.2 | 81.50     | 79.40     | 78.10     | 100       |           |
| CsSnRK2.6 | 74.70     | 85.30     | 88.90     | 82.00     | 100       |

**Table S6.** Absolute gene expression analysis by qRT-PCR of the ABA-signalosome components in ‘Navelate’ and ‘Pinalate’ varieties during fruit ripening and leaf dehydration. Values correspond to number of copies of each gene per  $\mu\text{g}$  of total RNA. Values are means of three biological replicates for each sampling period and variety.

|                     |          | Ripening Stage   | PYR/PYL/RCAR |       |       |      |      |       | PP2CA |      |       |       |       | SnRK2   |         |       |
|---------------------|----------|------------------|--------------|-------|-------|------|------|-------|-------|------|-------|-------|-------|---------|---------|-------|
|                     |          |                  | PYR1         | PYL2  | PYL4  | PYL5 | PYL8 | PYL9  | ABI1  | AHG1 | AHG3  | HAB1  | HAI3  | SnRK2.2 | SnRK2.6 |       |
|                     |          |                  |              |       |       |      |      |       |       |      |       |       |       |         |         |       |
| Fruit               | Navelate | IG               | 9            | n.d.  | 1566  | 1101 | 24   | 12757 | 692   | 267  | 3976  | 8714  | 806   | 16256   | 139325  |       |
|                     |          | M1               | 11           | n.d.  | 710   | 1239 | 16   | 7274  | 410   | 205  | 3897  | 5415  | 1385  | 2172    | 48701   |       |
|                     |          | M2               | 12           | n.d.  | 1548  | 2167 | 20   | 10136 | 452   | 227  | 5780  | 5649  | 386   | 993     | 10790   |       |
|                     |          | BK               | 5            | n.d.  | 656   | 772  | 22   | 7393  | 910   | 515  | 5805  | 6409  | 4217  | 1329    | 21883   |       |
|                     |          | C                | 5            | n.d.  | 691   | 440  | 17   | 7035  | 1755  | 685  | 14247 | 8034  | 8474  | 975     | 18380   |       |
|                     |          | FC               | 10           | n.d.  | 1386  | 1777 | 16   | 4633  | 517   | 455  | 7029  | 4707  | 2473  | 1362    | 17485   |       |
|                     | Pinalate | IG               | 16           | n.d.  | 1289  | 1313 | 23   | 16294 | 951   | 627  | 3005  | 8842  | 1081  | 9523    | 114626  |       |
|                     |          | M1               | 10           | n.d.  | 827   | 1323 | 17   | 7921  | 448   | 190  | 2590  | 6018  | 1000  | 2338    | 45145   |       |
|                     |          | M2               | 12           | n.d.  | 1271  | 2240 | 18   | 7959  | 293   | 211  | 3756  | 5669  | 570   | 2553    | 25048   |       |
|                     |          | BK               | 7            | n.d.  | 228   | 754  | 19   | 5599  | 724   | 153  | 5041  | 5424  | 3150  | 2823    | 73697   |       |
|                     |          | C                | 5            | n.d.  | 636   | 236  | 17   | 4575  | 1246  | 1170 | 7237  | 4482  | 6083  | 992     | 27681   |       |
|                     |          | FC               | 15           | n.d.  | 1694  | 2461 | 17   | 3890  | 278   | 243  | 2784  | 3253  | 1191  | 878     | 13993   |       |
|                     | Leaf     | Navelate Control | Time (h)     |       |       |      |      |       |       |      |       |       |       |         |         |       |
|                     |          |                  | 0            | 2     | 14285 | n.d. | 60   | n.d.  | 9701  | 941  | 78    | 5792  | 10897 | 1404    | 2081    | 89249 |
| 0.5                 |          |                  | 3            | 15739 | n.d.  | 19   | n.d. | 5438  | 994   | 74   | 5303  | 5543  | 2617  | 3188    | 80093   |       |
| 1                   |          |                  | 3            | 26296 | n.d.  | 34   | n.d. | 23444 | 1265  | 147  | 21048 | 12786 | 1721  | 7058    | 88636   |       |
| 3                   |          |                  | 5            | 6959  | n.d.  | 19   | n.d. | 17770 | 12915 | 575  | 17871 | 6708  | 8004  | 7915    | 226187  |       |
| 6                   |          |                  | 7            | 9551  | n.d.  | 7    | n.d. | 9128  | 14860 | 993  | 23212 | 32122 | 31092 | 7614    | 280793  |       |
| Navelate Dehydrated |          | 0.5              | 4            | 9502  | n.d.  | 10   | n.d. | 5471  | 1303  | 159  | 7421  | 8349  | 2041  | 10075   | 116749  |       |
|                     |          | 1                | 3            | 13953 | n.d.  | 20   | n.d. | 6409  | 1941  | 333  | 18297 | 6591  | 4435  | 1767    | 123039  |       |
|                     |          | 3                | 4            | 9016  | n.d.  | 13   | n.d. | 10582 | 27461 | 1177 | 45915 | 11233 | 24000 | 3520    | 197336  |       |
|                     |          | 6                | 6            | 2834  | n.d.  | 2    | n.d. | 11275 | 24788 | 1636 | 39621 | 10851 | 30651 | 5186    | 385560  |       |
|                     |          | 24               | 3            | 4713  | n.d.  | 2    | n.d. | 4011  | 20881 | 1257 | 28182 | 13576 | 11416 | 2296    | 98070   |       |
|                     |          | Pinalate Control | 0            | 3     | 10088 | n.d. | 47   | n.d.  | 7903  | 1225 | 84    | 8043  | 18094 | 1889    | 1658    | 91632 |
| 0.5                 |          |                  | 5            | 6931  | n.d.  | 19   | n.d. | 4243  | 757   | 60   | 6156  | 6784  | 2008  | 2464    | 106470  |       |
| 1                   |          |                  | 5            | 43144 | n.d.  | 36   | n.d. | 1548  | 4148  | 477  | 25649 | 35083 | 8803  | 5519    | 178654  |       |
| 3                   |          |                  | 10           | 14910 | n.d.  | 24   | n.d. | 20635 | 5914  | 329  | 10905 | 6800  | 9468  | 6457    | 361168  |       |
| 6                   |          |                  | 11           | 5060  | n.d.  | 8    | n.d. | 17515 | 15664 | 772  | 14101 | 15016 | 21672 | 6257    | 232467  |       |
| 24                  |          |                  | 10           | 8800  | n.d.  | 9    | n.d. | 9555  | 13371 | 300  | 21100 | 13213 | 21028 | 5650    | 166202  |       |
| Pinalate Dehydrated |          | 0.5              | 3            | 8659  | n.d.  | 18   | n.d. | 5579  | 858   | 87   | 4227  | 12878 | 3402  | 8018    | 153159  |       |
|                     |          | 1                | 5            | 6180  | n.d.  | 32   | n.d. | 7428  | 961   | 104  | 9189  | 6770  | 1709  | 1934    | 106777  |       |
|                     |          | 3                | 9            | 9079  | n.d.  | 14   | n.d. | 9139  | 24848 | 1262 | 26478 | 9791  | 26066 | 2160    | 377740  |       |
|                     |          | 6                | 10           | 3609  | n.d.  | 2    | n.d. | 10084 | 26187 | 1470 | 31848 | 17913 | 24384 | 6420    | 236768  |       |
|                     |          | 24               | 4            | 5351  | n.d.  | 1    | n.d. | 2968  | 23933 | 1359 | 26266 | 7678  | 27236 | 6948    | 302733  |       |

n.d. not detected

## Supplemental Figure Legends

**Figure S1.** Multiple sequence alignment of the *Arabidopsis thaliana* and *Citrus sinensis* ABA signalling core components. (A) START-like domain of the ABA-receptors, delimited by black triangles below the alignment. ABA-binding sites are indicated by arrows and PP2Cs interaction sites by asterisks. Boxes indicate *Gate* and *Latch* loops. Horizontal lines (1 and 2) above the alignment delimit the two ABA-binding regions. Line 2 is divided in 2a and 2b due to the insertion of 17 amino acid residues in CsPYL8 protein. (B) PP2C-like domain of the clade-A PP2Cs proteins, delimited by black triangles below the alignment. Metal-binding sites are pointed out by asterisks and phosphatase activity regulatory sequences are underlined. (C) Subclass III SnRK2s full protein sequences. Black triangles below the alignment delimit protein kinase domain, asterisk indicate ATP binding site and plus symbol highlights the proton acceptor active site. Horizontal lines are numbered as follows: 1, ATP binding region; 2, activation loop; 3, osmotic stress response domain I; and 4, ABA response and ABI1 binding domain II. Predicted secondary structures of AtPYR1 (A), AtABI1 (B) and AtSnRK2.6 (C) are reported below the corresponding alignment with alpha-helices as tubes, beta-strands as arrows and coiled regions as lines, as estimated by PSIPRED software. Dots indicate gaps in the amino acid sequences when compared with others for obtaining optimal alignments. Amino acids are numbered to the right of each line. Identical residues are in black, highly conservative are in dark grey and less conserved are in light grey.

**Figure S2.** Predicted tertiary structure model of the ABA-signalosome components of *Citrus* by using the *Arabidopsis* available crystallographic structure of homologous proteins as templates in I-Tasser program (left). Overlay of the predicted structure with the corresponding *Arabidopsis* homologous (right). Query structures are shown in cartoon, while templates are



displayed using purple trace. (A-D) PYR/PYL/RCAR ABA-receptors. (E) PP2CA. (F) SnRK2.

**Figure S3.** Gene expression analysis by RT-qPCR of *Citrus HVA22E* (upper panel) and *ALDH* (lower panel) in ‘Navelate’ (black) and ‘Pinalate’ (white) fruits during development and ripening stages (Immature Green, IG; Mature Green I, MI; Mature Green II, MII; Breaker, Bk; Coloured, C; Full Coloured, FC). Expression values are relative to transcript levels obtained in MI ‘Navelate’ fruits. Values are mean ratios  $\pm$  SE from three biological samples for each sampling period and variety, and analyzed in duplicate. Significant differences ( $p \leq 0.05$ ) in gene expression between ‘Navelate’ and ‘Pinalate’ flavedo samples for the same maturity stage are indicated by an asterisk.

A

AtPYR1 : IAEFHTYQLDPSGCSLLHAQRTHAPPPELVMSIVRRFDKPTQYKHEIKSCS.VEQNFE...MRVGCSTRDVMVSGIPANTSTERLDLDDERRVTGFSIIGGPHRL... : 102  
 CsPYR1 : VVEFHTYQLSQNCCSLLAQRIRANDVMSIVRRFDQPTQYKHEIKSCS.VSDNFT...MAVGCSTRDVMVSGIPAAATSTERLDLDDDRQVTGFSIIGGPHRL... : 102  
 AtPYL1 : IAEFHTYQLGNRCSSLLAQRTHAPPETVMSVVRREDRPOIYKHEIKSCN.VSEDFE...MRVGCSTRDVMVSGIPANTSRRERLDLDDRRVTGFSITGGPHRL... : 102  
 AtPYL2 : IKTYHQFEPTTCTSLITQRIHAPASVWELIRRFDFNPERYKHEVVKRCRLISGDE...VGSVREVMVSGIPASTSTERLEFVDDHRVLSFRVVGPHRLK... : 101  
 CsPYL2 : IERYHKFEQKPTCTSLITQRIDAPAHVWPFVRRFDNPKYKHEIKSCN.MHGDE...VGSIREVMVSGIPASTSTERLEILDDEKHILSFRVVGPHRL... : 100  
 AtPYL3 : IRTHTTFPRSPNTCTSLIAHRVDAPAHAIWRFVDFEAFNPKYKHEIKSCT.IRVNNGIKELKVGTRREVSVSGIPASTSVEILEVDDDEKRLSFRVLGGPHRL... : 106  
 AtPYL4 : AARFHTHEVGNQCCSAVIQETSAEISTVMSVVRREDNPOAYKHEFLKSCSVIGGDE...VGSLRQVHMVSGIPAASTERLDLDDERHVISFSVVGPHRL... : 102  
 CsPYL4 : VARHHTLVVGNQCCSSVVQIAAPVSTVMSVVRREDNPOAYKHEVKSCHVINGDE...VGLREVHMVSGIPAGRSTERLEILDDERHVISFSVVGPHRL... : 101  
 AtPYL5 : VAMHHTHDVGPDQCCSSVVMTHAPPESVWALVRRFDNPKVYKHEIROCRIVQDGLH...VGDREVHMVSGIPAVSTERLEILDEERHVISFSVVGPHRLK... : 102  
 CsPYL5 : LFPYHKHTVGNQCCSYAVQTIAPLPAVMSVVRREDNPOAYKHEFLKSCSVINGDE...VGLREVHMVSGIPAASTERLEILDDDEHHVLSFSVVGPHRL... : 101  
 AtPYL6 : VELSHTHVVGPSQCSVVVQDVEAPVSTVMSILSRFEBHPQAYKHEVKSCHVIGDERE...VGSVREVMVSGIPAASTERLEIMDDDRHVISFSVVGPHRL... : 102  
 AtPYL7 : LRLRHLHHCRENQCTSVLVKYIQAPVHLVMSLVRREDQPKYKHEIFSRCTV...NED...PEIGCLREVNMVSGIPATTSTERLEQLDDEEHILGINIIGGPHRLK... : 100  
 AtPYL8 : IRRHKKHELVDNQCSTLVKHINAPVHIVMSLVRREDQPKYKHEIFSRCVV...KEN...MEIGTVREVDMVSGIPATRSTERLELLDNEHILSIRIVGGPHRLK... : 100  
 CsPYL8 : IKRHHKHDVHDHQCSSLVKHIKAPVHLVMSLVRREDQPKYKHEVSRCTV...QED...LQIGSVREVMVSGIPATTSTERLELLDDEEHIFGMRIVGGPHRLK... : 102  
 AtPYL9 : VRTHHQHLCRENQCSTALVKHIKAPLHLVMSLVRREDQPKYKHEVSRCTV...IED...PEIGSIREVMVSGIPATTSTERLELLDDEEHILGKIIIGGPHRLK... : 100  
 CsPYL9 : IRRHHRHEPRENQCSTALVKHIRAPVHLVMSLVRREDQPKYKHEVSRCVV...NED...LGIGSVREVMVSGIPATTSTERLELLDDEEHILGKIVGGPHRL... : 100  
 AtPYL10 : IKKHHRHELVEQCSSTLVKHIKAPLHLVMSIVRRFDEPKYKHEIFSRCTV...QEK...LEVGSVREVMVSGIPATKSTERLEILDNEHILGIRIVGGPHRLK... : 101  
 AtPYL11 : ...METSQKYHTCGSTLVQTIAPLPLVMSILRRFDNPKYKHEVKTCKLRSGDE...EGSVREVMVSGIPAASTERLELDDEESHVMVISIIGGPHRL... : 97  
 AtPYL12 : ...MKTSEQHVCGSTLVQTIAPLPLVMSILRRFDNPKYKHEVKTCKLRSGDE...EGSVREVMVSGIPAASTERLELDDEESHVMVISIIGGPHRL... : 97  
 AtPYL13 : ...MESS.KQKRCRSSVVETIEAPLPLVMSILRRFEDNPOAYKHEVKSCTMRSGGEGGKGGKGSVRDPTVSGIPAASTERLELDDEESHVMVISIIGGPHRL... : 102

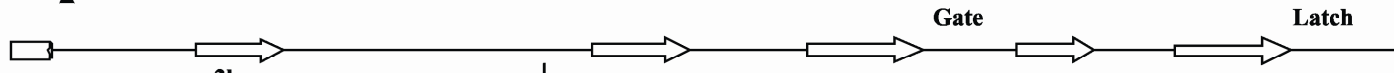

AtPYR1 : .....NYKSVTVVHRFE..KEN...RIWVWVLESYVVDVPEGNSEEDTRMEADTVVKLNLOKLAIVAEAMARNSGDGGSGSQVT..... : 175  
 CsPYR1 : .....NYRSVTVVHGFN..RDG...AICTVWVLESYVVDVPEGNTEEDTRLEADTVVKLNLOKLVSAESQVI..... : 164  
 AtPYL1 : .....NYKSVTVVHRFE..KEEEERIWVWVLESYVVDVPEGNSEEDTRLEADTVIRLNLOKLAISITEAMNRNNNNNSQVR..... : 178  
 AtPYL2 : .....NYKSVTVVNEFLN...ODSGKVYVWVLESYVVDVPEGNTEEDTKMFEVDTVVKLNLOKLVGAATSAPMHDE..... : 169  
 CsPYL2 : .....NYRSVTVVNEFQ...KGEIYIVTESYVVDVPEGNTEEDTKMFEVDTVVKLNLOKLVGVSMAHLHGHE..... : 165  
 AtPYL3 : .....NYRSVTVVNEFVLEKDKKRVYSVWVLESYVVDVPEGNTEEDTRMEVDTVVKSNLQNLAVISTASPT..... : 173  
 AtPYL4 : .....NYRSVTVLHPSPI...GTVWVLESYVVDVPEGNTEEDTCEVVDVIVRCNLQSLAKIAENTAAESKKKMSL..... : 169  
 CsPYL4 : .....NYRSVTVLHPSVAGN...GTVWVLESYVVDVPEGNTEEDTCEVVDVIVRCNLQSLAQTAENLRRNNNNHSSNNSSISSNNGPIRSCSVL : 188  
 AtPYL5 : .....NYRSVTVLHASDDE...GTVWVLESYVVDVPEGNTEEDTCEVVDVIVRCNLQSLARSTNRQ..... : 159  
 CsPYL5 : .....NYRSVTVLHASPCGT...GTVWVLESYVVDVPEGNTEEDTCEVVDVIVRCNLQSLAQISENMAARSNK..... : 165  
 AtPYL6 : .....NYKSVTVVHESEEDSDG...KKRFRVLESYVVDVPEGNTEEDTCEVVDVIVRCNLQSLAKLAENTSKES..... : 168  
 AtPYL7 : .....NYSSILTVHPEMIDG...RSGVMVLESYVVDVPEGNTEEDTCEVVDVIVRCNLQSLACVSRERLAAQDITNSIATFCNASNGYREKNHTETNL : 189  
 AtPYL8 : .....NYSSILTVHPEIIEG...RAGVMVLESYVVDVPEGNTEEDTCEVVDVIVRCNLQSLADVSRERLASQDITQ..... : 167  
 CsPYL8 : WNFNFIISTSSKLNQYSSIVTVHPEVIDG...RPGMLVLESYVVDVPEGNTEEDTCEVVDVIVRCNLQSLADVSEHLAVQDRTEPIDRI..... : 189  
 AtPYL9 : .....NYSSILTVHPEIIEG...RAGVMVLESYVVDVPEGNTEEDTCEVVDVIVRCNLQSLADVSRERLASQDITQ..... : 167  
 CsPYL9 : .....NYSSIMTVHPEIIDG...RPGMLVLESYVVDVPEGNTEEDTCEVVDVIVRCNLQSLADVSRERMAVQDRTEPINQF..... : 172  
 AtPYL10 : .....NYSSITSLHSETIDG...KTGLALLESYVVDVPEGNTEEDTCEVVDVIVRCNLQSLADVTERLQAESEMEKKI..... : 170  
 AtPYL11 : .....NYRSKTMFAVAADT...EEKVWVLESYVVDVPEGNTEEDTCEVVDVIVRCNLQSLADVSRERVAHLKL..... : 161  
 AtPYL12 : .....NYQSKTTFVVAEE...EEKVWVLESYVVDVPEGNTEEDTCEVVDVIVRCNLQSLADVSRERVAHLKL..... : 159  
 AtPYL13 : .....NYKSKTKVVASPEDM...AKKQVWVLESYVVDVPEGNTEEDTCEVVDVIVRCNLQSLADVSRERVAHLKL..... : 164

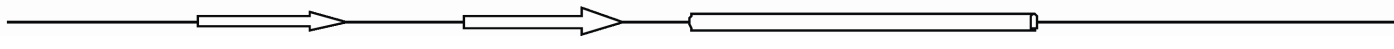

Figure S1A

**B**

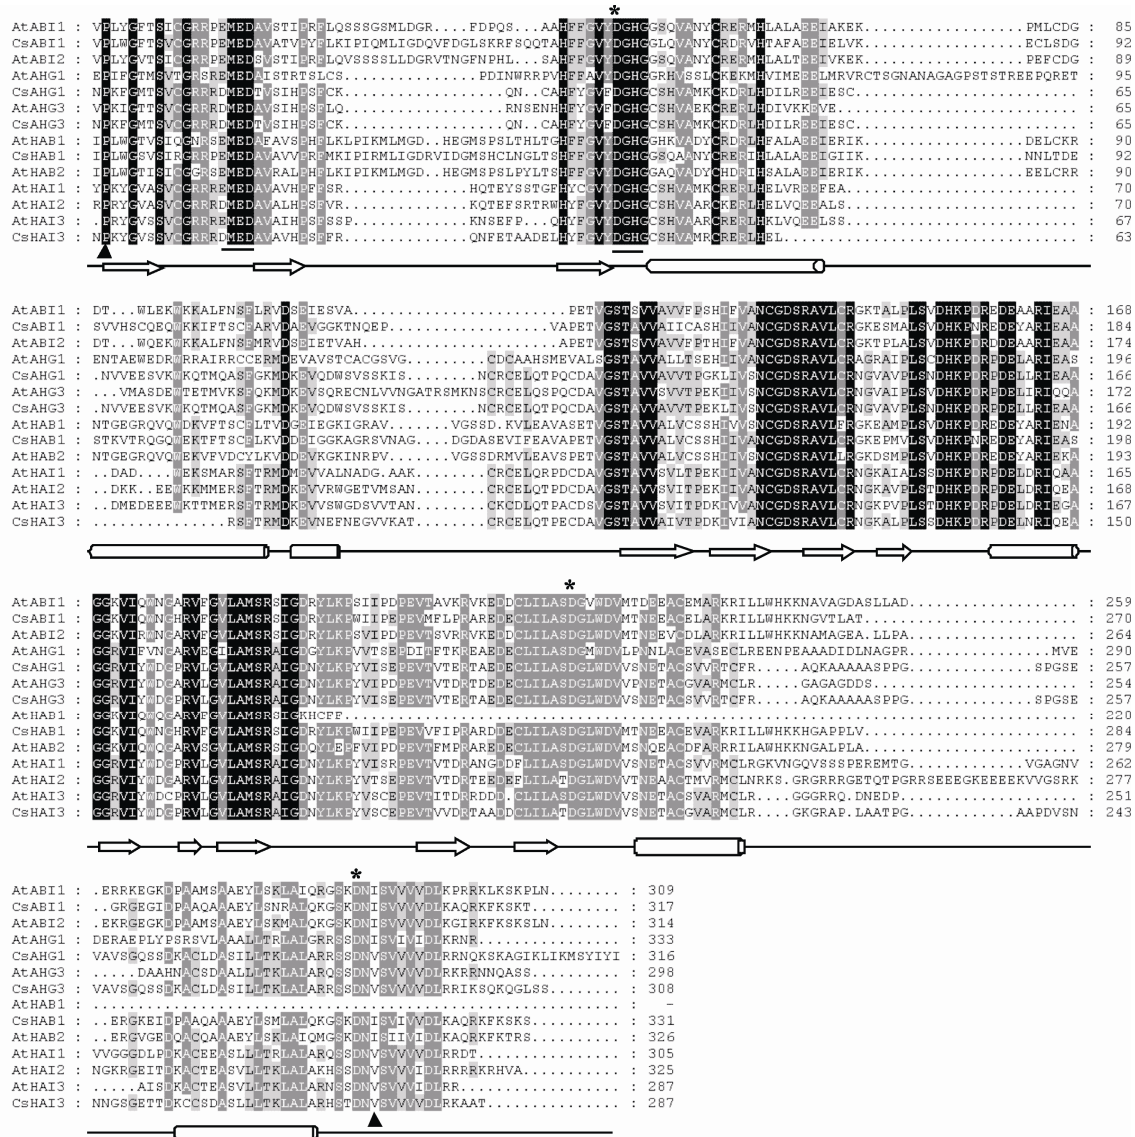

Figure S1B

C

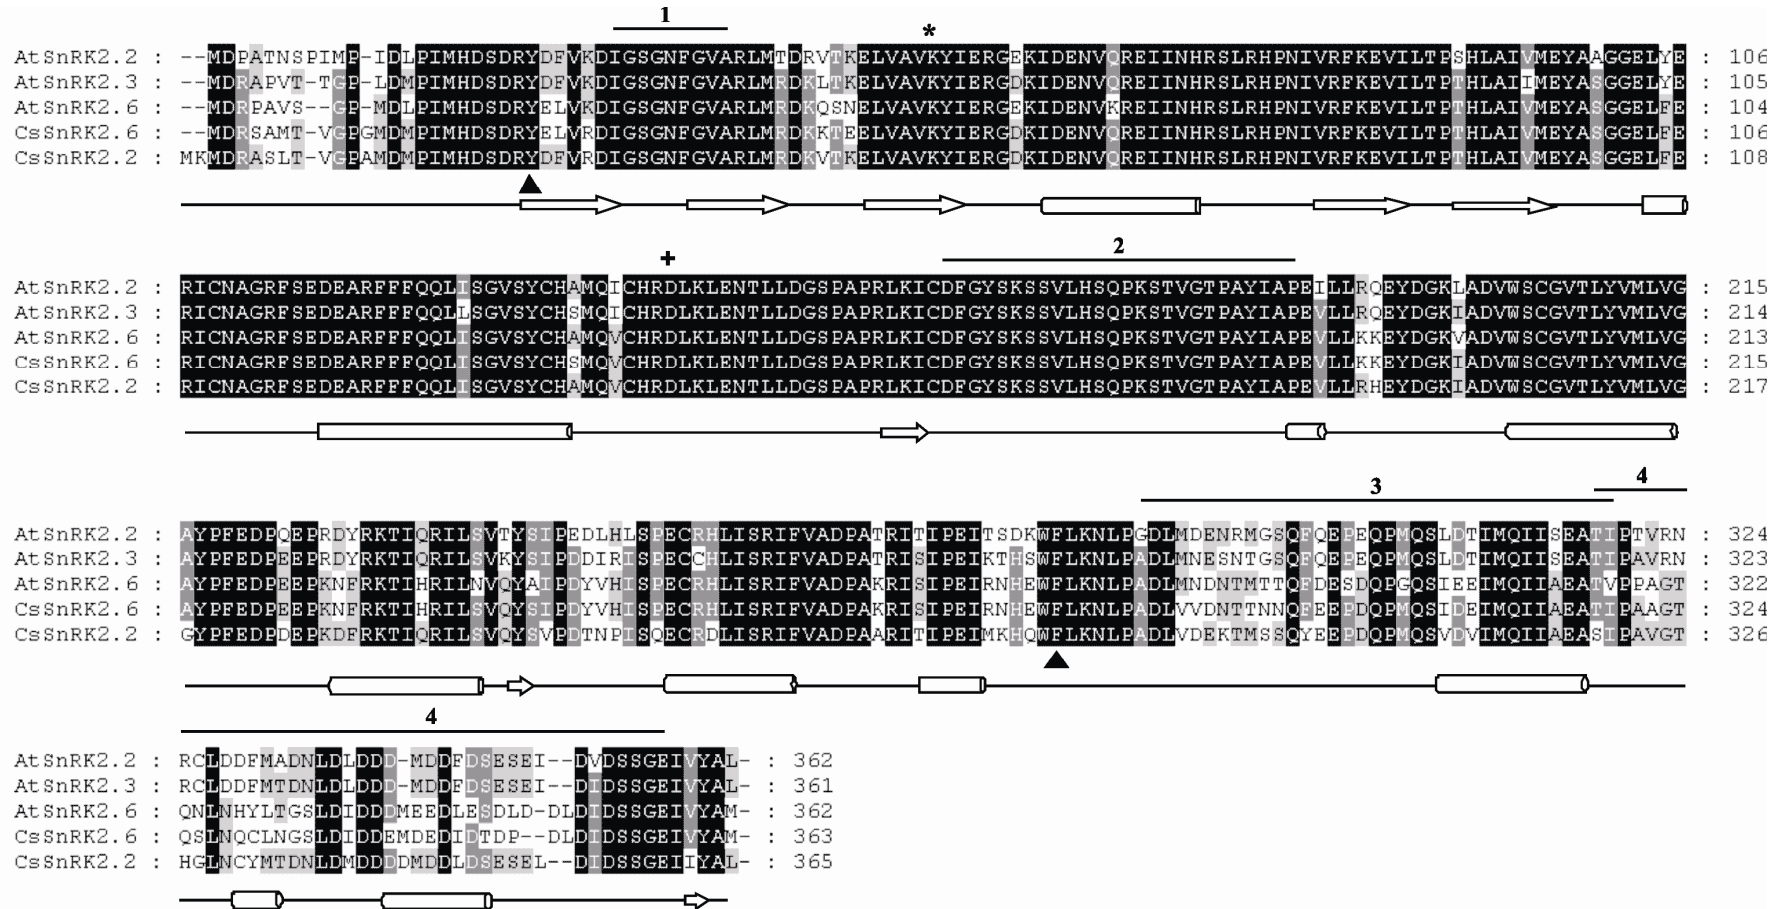

Figure S1C

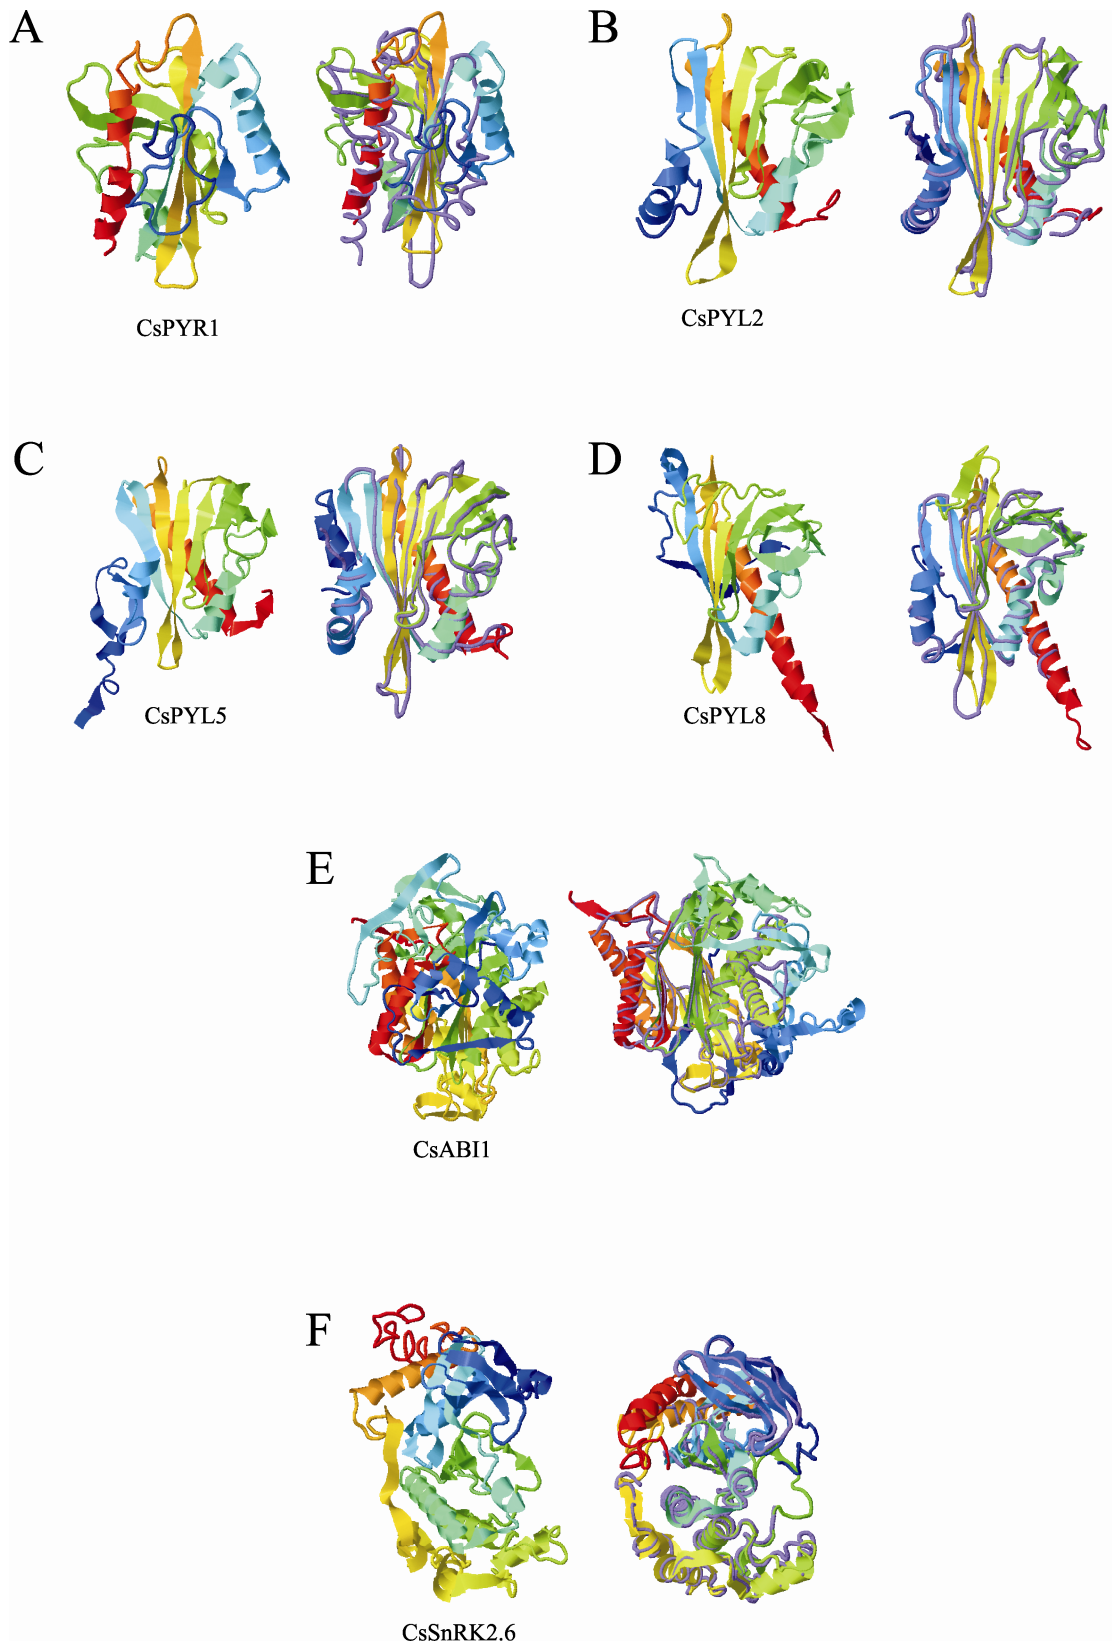

**Figure S2**

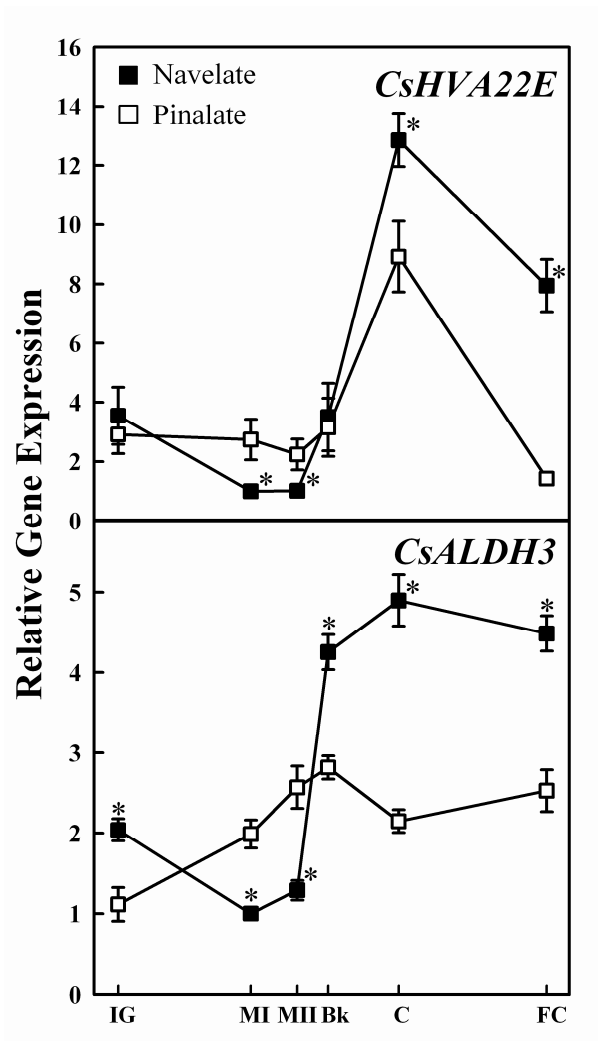

Figure S3
